# Supplementary material
Source: publisher figshare collection journal article supplement (https://acs.figshare.com/ndownloader/files/4658914)
Supplement: Supplementary file 1 [file 4658914]

(Supporting Information for an Article to the Editor of *Molecular Pharmaceutics*)

**Double-Stranded RNA Homopolymer Poly(rC)·Poly(rG) for a New pH-Sensitive Drug Carrier**

Shoichiro Asayama,\* Ai Ogawa, Hiroyoshi Kawakami, and Shoji Nagaoka

Department of Applied Chemistry, Tokyo Metropolitan University,  
1-1 Minami-Osawa, Hachioji, Tokyo 192-0397, Japan

\*To whom correspondence should be addressed.

E-mail: asayama-shoichiro@c.metro-u.ac.jp.

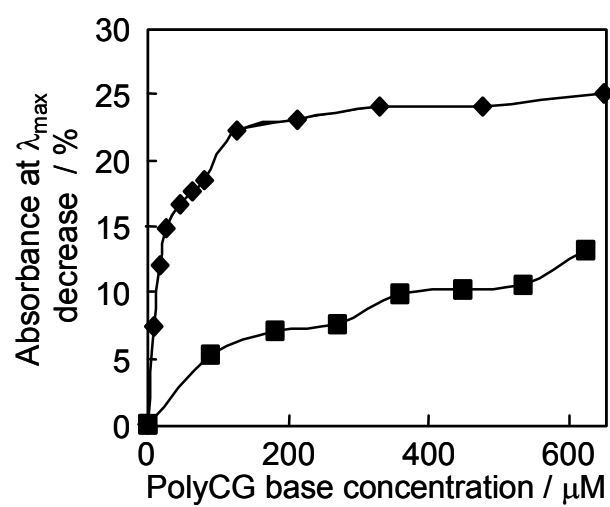

**Figure S-1.** Plot of absorbance at  $\lambda_{\max}$  of Dox (14  $\mu\text{M}$ ) against poly(rC)·poly(rG) (PolyCG) concentration in isotonic phosphate buffer: pH 7 (◆) or pH 5 (■).

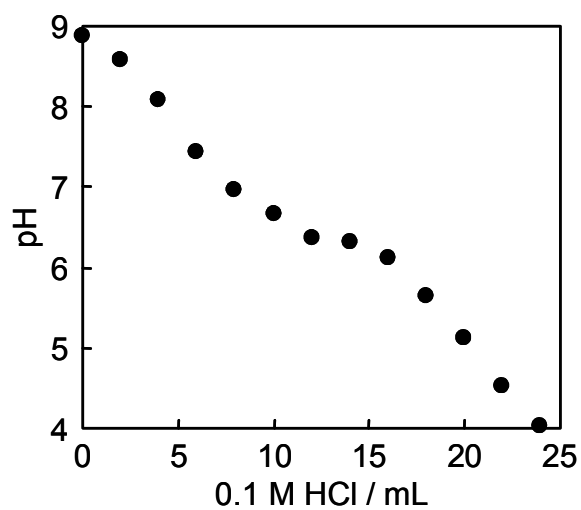

**Figure S-2.** Acid-base titration curve of poly(rC)·poly(rG)/Dox complex. Basic complex solution was titrated with the stepwise addition of 0.1 M HCl.

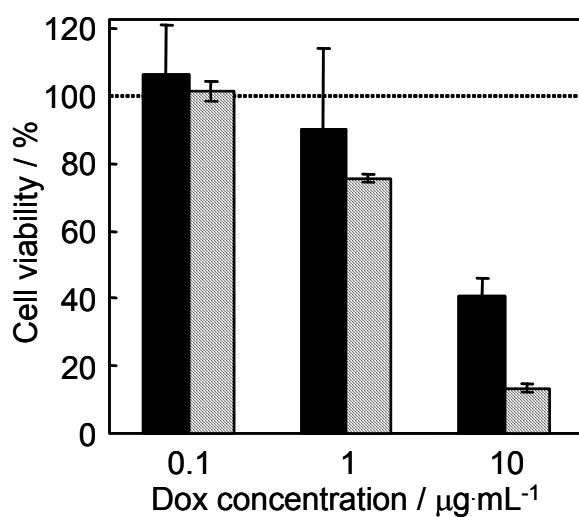

**Figure S-3.** Effect of the poly(rC)·poly(rG)/Dox complex on the viability of HepG2 cells after 48 h incubation. Plot of cell viability against Dox concentration (black bars: Dox alone, slashed bars: PolyCG/Dox), that is, viability curve, is represented. Error bars represent the mean and standard deviation of the measurements made in quadruplicate well.

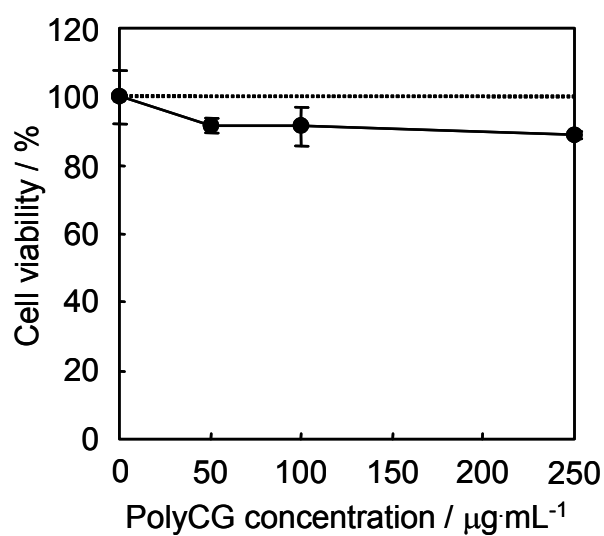

**Figure S-4.** Effect of poly(rC)·poly(rG) (PolyCG) on the viability of HepG2 cells after 48 h incubation. Error bars represent the mean and standard deviation of the measurements made in quadruplicate well.
